# Supplementary material
Source: PubMed Central journal article supplement (PMC3346386)
Supplement: supp_78.11.3966_AEM-AEM07825-11-s01.pdf [file supp_78.11.3966_AEM-AEM07825-11-s01.pdf]

**Supplemental Figure 1:** Agarose gel electrophoresis of PCR products generated from amplification of template DNA, respectively, derived from three *C. sakazakii* O1 stains ATCC29544, G2375, and G3885 (Lanes1-3), three *C. sakazakii* O2 strains ATCC12868, ATCC29004, and CCM 3460 (lanes 4-6), three *C. sakazakii* O3 strains G2538, G2726, and G3866 (lanes 7-9), three *C. sakazakii* O4 strains G2594, G3889, and G4064 (lanes 10-12), three *C. sakazakii* O5 strains G2706, G3884, and G4105 (lanes 13-15), three *C. sakazakii* O6 strains G2704, G3949, and G4030 (lanes 16-18), three *C. sakazakii* O7 strains G2592, G3868, and G4083 (lanes 19-21), *C. malonaticus* strain G3864 (lane 22), *C. muyjensii* strain G3886 (lane 23), 1 *C. dublinensis* strain G4061(lane 24), *C. turicensis* strain G3874 (lane 25), *E. cloacae* strains ATCC 10523 (lane 26), *E. aerogenes* strains CGMCC 1.876 (lane 27), *E. coli* strain ATCC 43887 (lane 28), *Salmonella enterica* strain ATCC 700141 (lane 29), *Shigella* ATCC 700930 (lane 30), negative control (lane 31). Lane M is DL2000 DNA marker. (a) *C. sakazakii* O1 specific primers wl-35646 and wl-35647 were used. (b) *C. sakazakii* O2 specific primers wl-37256 and wl-37257 were used. (c) *C. sakazakii* O3 specific primers wl-37258 and wl-37259 were used. (d) *C. sakazakii* O4 specific primers wl-39105 and wl-39106 were used. (e) *C. sakazakii* O5 specific primers wl-39873 and wl-39874 were used. (f) *C. sakazakii* O6 specific primers wl-40041 and wl-40042 were used. (g) *C. sakazakii* O7 specific primers wl-40039 and wl-40040 were used.

**Supplemental Figure 1:**

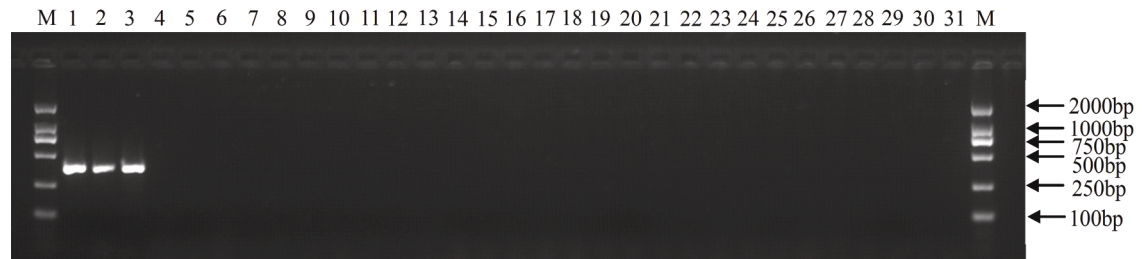

(a)

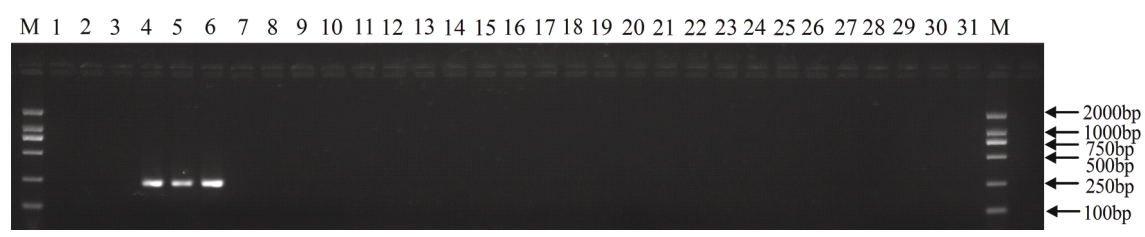

(b)

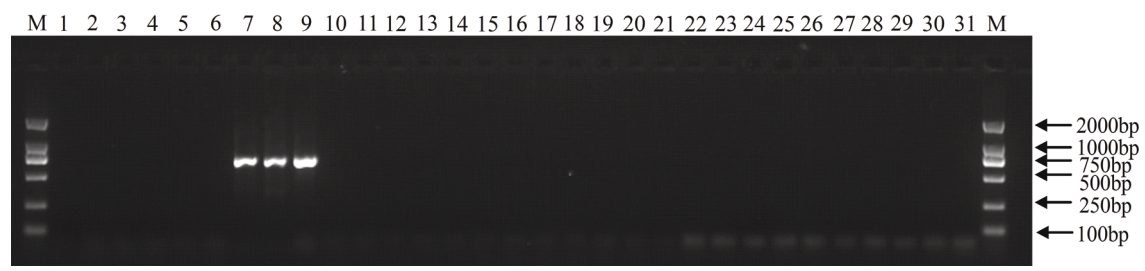

(c)

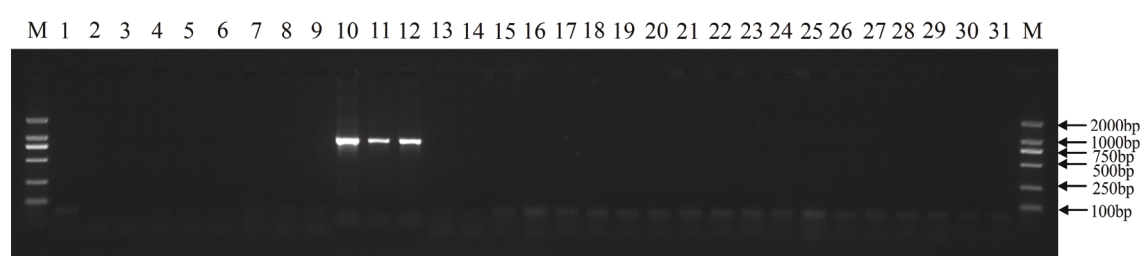

(d)

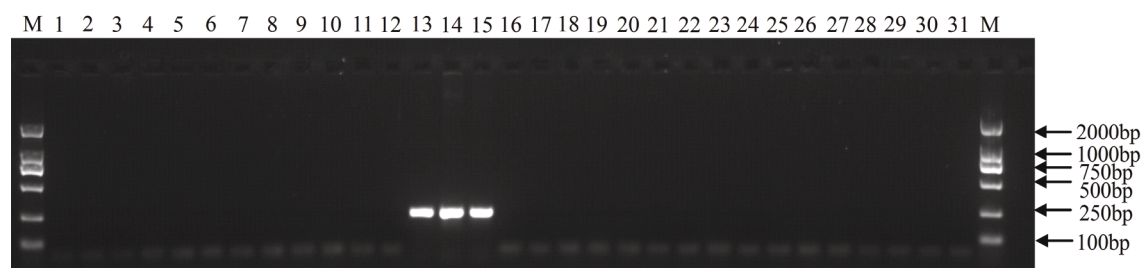

(e)

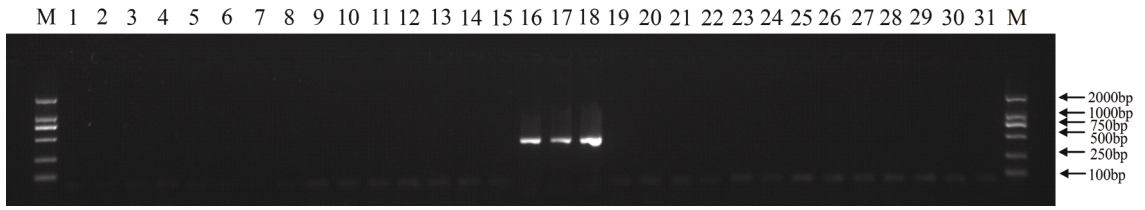

(f)

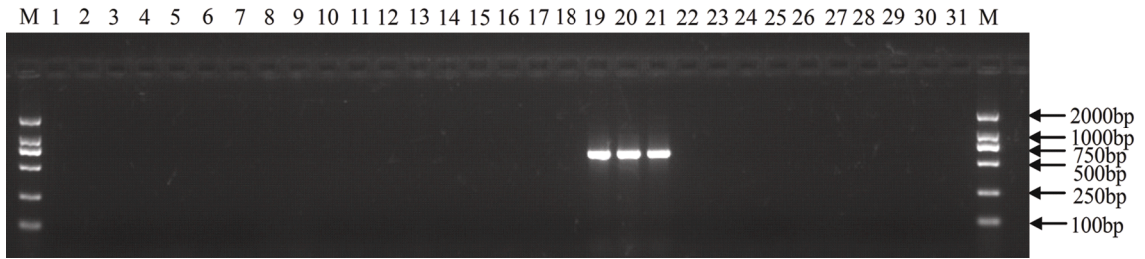

(g)
